# Supplementary material for: Incorporating Added Sugar Improves the Performance of the Health Star Rating Front-of-Pack Labelling System in Australia
Source: MDPI journal article supplement (doi:10.3390/nu9070701), 2017-07-05
Supplement: s1 [file s1]

## **Supplementary Materials: Incorporating Added Sugar Improves the Performance of the Health Star Rating Front-of-Pack Labelling System in Australia**

**Sanne A. E. Peters, Elizabeth Dunford, Alexandra Jones, Cliona Ni Mhurchu, Michelle Crino, Fraser Taylor, Mark Woodward and Bruce Neal**

**Table S1.** Nutritional composition of included foods, by food group.

|                                     | n    | Energy            | Saturated fat |             | Sugars |             | Sodium |                 | FVNL |              | Fibre |             | Protein |             | HSR            | Added sugar* |             |
|-------------------------------------|------|-------------------|---------------|-------------|--------|-------------|--------|-----------------|------|--------------|-------|-------------|---------|-------------|----------------|--------------|-------------|
|                                     |      | kJ/100g           | %             | g/100g      | %      | g/100g      | %      | g/100g          | %    | %/100g       | %     | g/100g      | %       | g/100g      |                | %            | g/100g      |
| Bread and bakery products           |      |                   |               |             |        |             |        |                 |      |              |       |             |         |             |                |              |             |
| All                                 | 4021 | 1630 (1170; 1900) | 99            | 3 (1; 9)    | 99     | 7 (2; 30)   | 100    | 372 (230; 520)  | 3    | 22 (22; 22)  | 98    | 4 (3; 5)    | 100     | 7 (5; 9)    | 2.0 (1.5; 3.5) | 79           | 16 (2; 30)  |
| Core                                | 1449 | 1110 (1010; 1330) | 100           | 1 (0; 1)    | 99     | 3 (1; 4)    | 100    | 400 (360; 542)  | 0    | NA           | 100   | 4 (4; 5)    | 100     | 9 (7; 10)   | 3.5 (3.0; 4.0) | 43           | 1 (1; 2)    |
| Discretionary                       | 2572 | 1800 (1555; 2016) | 99            | 7 (3; 12)   | 99     | 25 (5; 35)  | 100    | 300 (185; 490)  | 4    | 22 (22; 22)  | 97    | 3 (2; 5)    | 100     | 6 (5; 8)    | 1.5 (1.0; 2.5) | 99           | 17 (3; 31)  |
| Cereal and grain products           |      |                   |               |             |        |             |        |                 |      |              |       |             |         |             |                |              |             |
| All                                 | 3254 | 1550 (1470; 1720) | 96            | 1 (1; 3)    | 95     | 8 (2; 21)   | 98     | 39 (10; 224)    | 31   | 15 (13; 31)  | 97    | 7 (4; 9)    | 100     | 10 (7; 12)  | 4.0 (3.0; 4.5) | 68           | 11 (2; 14)  |
| Core                                | 2526 | 1520 (1445; 1620) | 95            | 1 (0; 2)    | 94     | 3 (1; 14)   | 98     | 30 (7; 235)     | 27   | 31 (15; 31)  | 97    | 7 (4; 10)   | 100     | 11 (8; 13)  | 4.0 (3.5; 4.5) | 59           | 3 (1; 11)   |
| Discretionary                       | 728  | 1740 (1610; 1900) | 99            | 4 (2; 7)    | 100    | 25 (18; 31) | 100    | 102 (32; 200)   | 44   | 13 (13; 13)  | 100   | 6 (5; 8)    | 100     | 8 (6; 10)   | 2.5 (2.0; 3.5) | 100          | 14 (12; 23) |
| Confectionery                       |      |                   |               |             |        |             |        |                 |      |              |       |             |         |             |                |              |             |
| All (all discretionary)             | 3096 | 1980 (1530; 2230) | 91            | 14 (2; 19)  | 97     | 53 (43; 60) | 97     | 60 (25; 95)     | 9    | 38 (25; 38)  | 56    | 6 (4; 11)   | 92      | 5 (3; 7)    | 1.0 (0.5; 1.5) | 100          | 46 (43; 49) |
| Convenience foods                   |      |                   |               |             |        |             |        |                 |      |              |       |             |         |             |                |              |             |
| All                                 | 1602 | 485 (314; 731)    | 97            | 1 (1; 3)    | 99     | 3 (2; 4)    | 100    | 290 (240; 391)  | 79   | 42 (25; 45)  | 72    | 1 (1; 2)    | 100     | 5 (3; 8)    | 3.5 (3.0; 3.5) | 85           | 1 (0; 1)    |
| Core                                | 729  | 369 (207; 690)    | 95            | 1 (0; 2)    | 99     | 3 (2; 5)    | 100    | 276 (235; 351)  | 88   | 45 (29; 48)  | 58    | 1 (1; 1)    | 100     | 3 (1; 6)    | 3.5 (3.5; 3.5) | 86           | 1 (0; 3)    |
| Discretionary                       | 873  | 541 (406; 758)    | 99            | 2 (1; 3)    | 99     | 3 (2; 4)    | 100    | 305 (244; 430)  | 72   | 28 (13; 44)  | 84    | 1 (1; 2)    | 100     | 6 (5; 10)   | 3.5 (3.0; 3.5) | 84           | 1 (0; 1)    |
| Dairy                               |      |                   |               |             |        |             |        |                 |      |              |       |             |         |             |                |              |             |
| All                                 | 4566 | 628 (352; 1280)   | 98            | 4 (2; 15)   | 98     | 8 (3; 16)   | 100    | 60 (44; 280)    | 11   | 7 (7; 7)     | 2     | 1 (1; 1)    | 100     | 4 (3; 9)    | 3.0 (2.0; 4.0) | 65           | 6 (4; 14)   |
| Core                                | 3283 | 494 (300; 1270)   | 99            | 3 (1; 16)   | 97     | 5 (1; 10)   | 100    | 63 (45; 570)    | 15   | 7 (7; 7)     | 0     | NA          | 100     | 5 (3; 17)   | 3.5 (2.0; 4.0) | 56           | 4 (0; 5)    |
| Discretionary                       | 1283 | 903 (640; 1290)   | 95            | 8 (3; 12)   | 100    | 21 (16; 25) | 100    | 52 (35; 77)     | 0    | NA           | 6     | 1 (1; 1)    | 99      | 3 (2; 4)    | 2.0 (1.5; 3.0) | 87           | 15 (14; 19) |
| Edible oils and oil emulsions       |      |                   |               |             |        |             |        |                 |      |              |       |             |         |             |                |              |             |
| All                                 | 689  | 3378 (2610; 3436) | 100           | 15 (13; 33) | 47     | 1 (1; 1)    | 59     | 340 (5; 380)    | 0    | NA           | 0     | NA          | 47      | 1 (1; 1)    | 3.0 (1.0; 3.5) | 0            | NA          |
| Core                                | 531  | 3390 (2420; 3446) | 100           | 14 (13; 16) | 34     | 1 (1; 1)    | 50     | 340 (5; 360)    | 0    | NA           | 0     | NA          | 34      | 1 (1; 1)    | 3.5 (3.0; 3.5) | 0            | NA          |
| Discretionary                       | 158  | 3025 (3000; 3080) | 100           | 53 (35; 55) | 91     | 1 (1; 1)    | 91     | 375 (19; 640)   | 0    | NA           | 0     | NA          | 92      | 1 (1; 1)    | 1.0 (0.5; 1.0) | 0            | NA          |
| Eggs                                |      |                   |               |             |        |             |        |                 |      |              |       |             |         |             |                |              |             |
| All (all core)                      | 209  | 559 (559; 559)    | 99            | 3 (3; 3)    | 100    | 0 (0; 0)    | 100    | 136 (136; 136)  | 0    | NA           | 0     | NA          | 100     | 12 (12; 12) | 4.0 (4.0; 4.0) | 0            | NA          |
| Seafood                             |      |                   |               |             |        |             |        |                 |      |              |       |             |         |             |                |              |             |
| All (all core)                      | 1309 | 687 (482; 855)    | 98            | 1 (1; 2)    | 81     | 1 (1; 2)    | 100    | 393 (290; 520)  | 0    | NA           | 0     | NA          | 100     | 18 (13; 22) | 4.0 (3.5; 4.0) | 39           | 2 (2; 2)    |
| Fruit, vegetables, nuts and legumes |      |                   |               |             |        |             |        |                 |      |              |       |             |         |             |                |              |             |
| All                                 | 4227 | 884 (266; 1640)   | 84            | 1 (0; 4)    | 97     | 7 (3; 30)   | 97     | 31 (6; 300)     | 89   | 78 (61; 85)  | 94    | 5 (2; 7)    | 98      | 3 (1; 9)    | 3.5 (3.0; 4.5) | 39           | 11 (5; 18)  |
| Core                                | 3137 | 597 (243; 2171)   | 87            | 1 (0; 5)    | 98     | 6 (3; 15)   | 98     | 21 (5; 230)     | 96   | 85 (67; 100) | 95    | 6 (2; 7)    | 99      | 3 (1; 12)   | 4.0 (3.5; 4.5) | 39           | 8 (5; 11)   |
| Discretionary                       | 1090 | 992 (553; 1150)   | 75            | 1 (0; 2)    | 95     | 26 (3; 59)  | 95     | 348 (13; 1600)  | 68   | 56 (44; 78)  | 89    | 2 (1; 9)    | 96      | 1 (1; 3)    | 2.0 (2.0; 3.0) | 40           | 52 (49; 52) |
| Meat and meat alternatives          |      |                   |               |             |        |             |        |                 |      |              |       |             |         |             |                |              |             |
| All                                 | 1955 | 868 (601; 1060)   | 100           | 4 (2; 7)    | 97     | 1 (1; 2)    | 100    | 569 (364; 970)  | 8    | 81 (81; 81)  | 33    | 2 (2; 3)    | 100     | 16 (12; 20) | 3.0 (1.5; 4.0) | 59           | 1 (0; 1)    |
| Core                                | 616  | 648 (493; 858)    | 100           | 2 (1; 4)    | 98     | 1 (1; 2)    | 100    | 330 (129; 498)  | 25   | 81 (81; 81)  | 44    | 2 (1; 3)    | 100     | 17 (13; 20) | 4.0 (3.5; 4.5) | 48           | 1 (1; 8)    |
| Discretionary                       | 1339 | 954 (700; 1120)   | 100           | 6 (3; 8)    | 97     | 1 (1; 1)    | 100    | 759 (474; 1180) | 0    | NA           | 29    | 2 (2; 2)    | 100     | 16 (12; 20) | 2.0 (1.5; 3.0) | 64           | 1 (0; 1)    |
| Beverages                           |      |                   |               |             |        |             |        |                 |      |              |       |             |         |             |                |              |             |
| All                                 | 3101 | 177 (105; 200)    | 34            | 1 (0; 1)    | 88     | 9 (7; 11)   | 94     | 8 (5; 15)       | 41   | 88 (87; 96)  | 1     | 28 (28; 28) | 63      | 1 (0; 1)    | 2.0 (1.5; 4.0) | 69           | 4 (3; 10)   |

|                                           |      |                   |    |           |     |             |     |                 |     |                |     |             |     |             |                |     |             |
|-------------------------------------------|------|-------------------|----|-----------|-----|-------------|-----|-----------------|-----|----------------|-----|-------------|-----|-------------|----------------|-----|-------------|
| Core                                      | 1704 | 184 (156; 210)    | 45 | 1 (0; 1)  | 92  | 9 (7; 11)   | 93  | 6 (4; 10)       | 74  | 88 (87; 96)    | 2   | 28 (28; 28) | 86  | 1 (0; 1)    | 4.0 (2.0; 4.5) | 68  | 3 (3; 4)    |
| Discretionary                             | 1397 | 148 (64; 192)     | 20 | 1 (0; 1)  | 83  | 10 (6; 11)  | 96  | 11 (6; 18)      | 0   | NA             | 0   | NA          | 36  | 1 (0; 1)    | 1.5 (1.0; 2.0) | 71  | 10 (9; 10)  |
| <b>Sauces, dressings and spreads</b>      |      |                   |    |           |     |             |     |                 |     |                |     |             |     |             |                |     |             |
| All                                       | 3588 | 624 (330; 1120)   | 86 | 1 (0; 4)  | 98  | 7 (3; 20)   | 99  | 525 (330; 990)  | 66  | 98 (25; 100)   | 64  | 2 (1; 4)    | 98  | 2 (1; 4)    | 2.5 (1.5; 3.5) | 94  | 5 (1; 16)   |
| Core                                      | 196  | 2470 (407; 2626)  | 97 | 7 (1; 9)  | 98  | 7 (4; 11)   | 99  | 68 (11; 431)    | 100 | 100 (100; 100) | 100 | 6 (4; 10)   | 99  | 21 (4; 24)  | 4.5 (4.0; 5.0) | 100 | 2 (1; 6)    |
| Discretionary                             | 3392 | 604 (328; 1060)   | 85 | 1 (0; 3)  | 98  | 7 (3; 21)   | 99  | 545 (350; 1055) | 64  | 40 (25; 100)   | 62  | 2 (1; 4)    | 98  | 2 (1; 4)    | 2.5 (1.5; 3.5) | 93  | 5 (1; 16)   |
| <b>Snack foods</b>                        |      |                   |    |           |     |             |     |                 |     |                |     |             |     |             |                |     |             |
| All (all discretionary)                   | 1328 | 2040 (1824; 2160) | 99 | 3 (2; 10) | 97  | 4 (2; 7)    | 100 | 560 (400; 785)  | 82  | 100 (100; 100) | 91  | 3 (3; 6)    | 100 | 7 (6; 9)    | 3.0 (2.0; 4.0) | 88  | 2 (1; 5)    |
| <b>Foods for specific dietary use</b>     |      |                   |    |           |     |             |     |                 |     |                |     |             |     |             |                |     |             |
| All                                       | 598  | 1490 (346; 1610)  | 97 | 3 (1; 6)  | 100 | 8 (4; 22)   | 100 | 180 (65; 290)   | 0   | NA             | 71  | 11 (6; 11)  | 98  | 25 (6; 32)  | 3.8 (2.5; 4.5) | 100 | 57 (5; 57)  |
| Core                                      | 276  | 342 (290; 1584)   | 99 | 1 (0; 2)  | 100 | 8 (7; 36)   | 100 | 81 (65; 327)    | 0   | NA             | 43  | 6 (6; 6)    | 100 | 7 (4; 28)   | 4.0 (2.0; 4.5) | 100 | 5 (2; 5)    |
| Discretionary                             | 322  | 1544 (1436; 1662) | 95 | 6 (5; 8)  | 100 | 6 (3; 18)   | 100 | 190 (130; 267)  | 0   | NA             | 95  | 11 (11; 11) | 97  | 29 (22; 33) | 3.0 (2.5; 4.5) | 100 | 57 (57; 57) |
| <b>Sugars, honey and related products</b> |      |                   |    |           |     |             |     |                 |     |                |     |             |     |             |                |     |             |
| All (all discretionary)                   | 772  | 1416 (1340; 1670) | 40 | 1 (0; 3)  | 96  | 82 (60; 87) | 90  | 15 (6; 35)      | 0   | NA             | 0   | NA          | 74  | 0 (0; 1)    | 1.0 (0.5; 1.5) | 100 | 5 (1; 36)   |

HSR, Health Star Rating. Values are presented as median (25<sup>th</sup> percentile; 75<sup>th</sup> percentile). % indicates percentage of products that displayed a value. \*calculated in products with non-zero levels, as derived from AUSNUT.

**Table S2.** Area under the receiver operating characteristic curve to discriminate between core and discretionary foods of nutrients used in the Health Star Rating algorithm and added sugar.

|                                             | Nutrient added from previous step |                             |                             |                             |                             |                             |                             |                                    |
|---------------------------------------------|-----------------------------------|-----------------------------|-----------------------------|-----------------------------|-----------------------------|-----------------------------|-----------------------------|------------------------------------|
|                                             | Step 1                            | Step 2                      | Step 3                      | Step 4                      | Step 5                      | Step 6                      | Step 7                      | Step 8                             |
|                                             | NA                                | Total sugar                 | + Sodium                    | + Protein                   | + FVNL                      | + Energy                    | + Saturated fat             | + Fibre                            |
| Nutrient to be added (if not added already) |                                   |                             |                             |                             |                             |                             |                             |                                    |
| Energy                                      | 0.614 (0.608; 0.620)              | 0.693 (0.687; 0.698)        | 0.775 (0.771; 0.780)        | 0.809 (0.804; 0.813)        | <b>0.816 (0.811; 0.820)</b> | In model                    | In model                    | In model                           |
| Saturated fat                               | 0.587 (0.580; 0.593)              | 0.699 (0.693; 0.704)        | 0.779 (0.774; 0.784)        | 0.809 (0.805; 0.814)        | 0.815 (0.811; 0.820)        | <b>0.817 (0.812; 0.821)</b> | In model                    | In model                           |
| Total sugar                                 | <b>0.692 (0.686; 0.697)</b>       | In model                           |
| Sodium                                      | 0.602 (0.596; 0.608)              | <b>0.776 (0.771; 0.781)</b> | In model                           |
| FVNL                                        | 0.569 (0.564; 0.574)              | 0.710 (0.705; 0.716)        | 0.773 (0.768; 0.778)        | <b>0.812 (0.807; 0.817)</b> | In model                    | In model                    | In model                    | In model                           |
| Fibre                                       | 0.499 (0.493; 0.505)              | 0.694 (0.688; 0.699)        | 0.775 (0.770; 0.780)        | 0.805 (0.800; 0.810)        | 0.812 (0.808; 0.817)        | 0.816 (0.811; 0.820)        | <b>0.817 (0.812; 0.821)</b> | In model                           |
| Protein                                     | 0.620 (0.614; 0.626)              | 0.716 (0.711; 0.722)        | <b>0.805 (0.801; 0.810)</b> | In model                           |
| <i>Added sugar</i>                          | <i>0.777 (0.772; 0.782)</i>       | <i>0.783 (0.778; 0.788)</i> | <i>0.844 (0.840; 0.848)</i> | <i>0.867 (0.864; 0.871)</i> | <i>0.869 (0.866; 0.873)</i> | <i>0.871 (0.868; 0.875)</i> | <i>0.872 (0.868; 0.875)</i> | <b><i>0.871 (0.867; 0.874)</i></b> |

FVNL, Fruit, vegetable, nut and legume; HSR, Health Star Rating. Values represent the area under the receiver operating characteristic curve (95% confidence interval). Printed in bold are the results for the nutrient that resulted in the highest AUC at each step. Models including added sugar are printed in italics.

**Table S3.** Percentage of foods with no sugars, only intrinsic sugars, only added sugars, or a mix of both added or free sugars and intrinsic sugars, by food group.

| <b>Bread and bakery products</b>           | <b>N</b> | <b>No sugars,<br/>%</b> | <b>Only<br/>intrinsic<br/>sugars, %</b> | <b>Only<br/>added<br/>sugars, %</b> | <b>Mix of<br/>added and<br/>intrinsic<br/>sugars, %</b> |
|--------------------------------------------|----------|-------------------------|-----------------------------------------|-------------------------------------|---------------------------------------------------------|
| <i>Core</i>                                | 1449     | 0                       | 57                                      | 1                                   | 43                                                      |
| <i>Discretionary</i>                       | 2572     | 0                       | 1                                       | 1                                   | 98                                                      |
| <b>Cereal and grain products</b>           |          |                         |                                         |                                     |                                                         |
| <i>Core</i>                                | 2526     | 5                       | 36                                      | 1                                   | 58                                                      |
| <i>Discretionary</i>                       | 728      | 0                       | 0                                       | 0                                   | 100                                                     |
| <b>Confectionery</b>                       |          |                         |                                         |                                     |                                                         |
| <i>Discretionary</i>                       | 3096     | 0                       | 0                                       | 3                                   | 97                                                      |
| <b>Convenience foods</b>                   |          |                         |                                         |                                     |                                                         |
| <i>Core</i>                                | 729      | 0                       | 14                                      | 1                                   | 85                                                      |
| <i>Discretionary</i>                       | 873      | 0                       | 16                                      | 1                                   | 83                                                      |
| <b>Dairy</b>                               |          |                         |                                         |                                     |                                                         |
| <i>Core</i>                                | 3283     | 2                       | 42                                      | 0                                   | 55                                                      |
| <i>Discretionary</i>                       | 1283     | 0                       | 13                                      | 0                                   | 87                                                      |
| <b>Edible oils and oil emulsions</b>       |          |                         |                                         |                                     |                                                         |
| <i>Core</i>                                | 531      | 66                      | 34                                      | 0                                   | 0                                                       |
| <i>Discretionary</i>                       | 158      | 9                       | 91                                      | 0                                   | 0                                                       |
| <b>Eggs</b>                                |          |                         |                                         |                                     |                                                         |
| <i>Core</i>                                | 209      | 0                       | 100                                     | 0                                   | 0                                                       |
| <b>Seafood</b>                             |          |                         |                                         |                                     |                                                         |
| <i>Core</i>                                | 1309     | 11                      | 50                                      | 8                                   | 31                                                      |
| <b>Fruit, vegetables, nuts and legumes</b> |          |                         |                                         |                                     |                                                         |
| <i>Core</i>                                | 3137     | 1                       | 60                                      | 1                                   | 38                                                      |
| <i>Discretionary</i>                       | 1090     | 5                       | 55                                      | 0                                   | 40                                                      |
| <b>Meat and meat alternatives</b>          |          |                         |                                         |                                     |                                                         |
| <i>Core</i>                                | 616      | 2                       | 50                                      | 0                                   | 48                                                      |
| <i>Discretionary</i>                       | 1339     | 1                       | 34                                      | 1                                   | 63                                                      |
| <b>Beverages</b>                           |          |                         |                                         |                                     |                                                         |
| <i>Core</i>                                | 1704     | 8                       | 25                                      | 1                                   | 67                                                      |
| <i>Discretionary</i>                       | 1397     | 4                       | 25                                      | 13                                  | 58                                                      |
| <b>Sauces, dressings, and spreads</b>      |          |                         |                                         |                                     |                                                         |
| <i>Core</i>                                | 196      | 0                       | 0                                       | 2                                   | 98                                                      |
| <i>Discretionary</i>                       | 3392     | 0                       | 6                                       | 2                                   | 92                                                      |
| <b>Snack foods</b>                         |          |                         |                                         |                                     |                                                         |
| <i>Discretionary</i>                       | 1328     | 1                       | 11                                      | 2                                   | 86                                                      |
| <b>Foods for specific dietary use</b>      |          |                         |                                         |                                     |                                                         |
| <i>Core</i>                                | 276      | 0                       | 0                                       | 0                                   | 100                                                     |
| <i>Discretionary</i>                       | 322      | 0                       | 0                                       | 0                                   | 100                                                     |
| <b>Sugars, honey and related products</b>  |          |                         |                                         |                                     |                                                         |
| <i>Discretionary</i>                       | 772      | 0                       | 0                                       | 4                                   | 96                                                      |
